# Supplementary material for: High-resolution projections of ambient heat for major European cities using different heat metrics
Source: Copernicus journal article supplement (doi:10.5194/nhess-2023-99), 2023-07-06
Supplement: Supplementary file 1 [file nhess-2023-99-supplement.pdf]

# **Supplementary information for the article “High-resolution projections of ambient heat for major European cities using different heat metrics”**

Clemens Schwingshackl<sup>1,2</sup>, Anne Sophie Daloz<sup>2</sup>, Carley Iles<sup>2</sup>, Kristin Aunan<sup>2</sup>, Jana Sillmann<sup>3,2</sup>

<sup>1</sup>Department of Geography, Ludwig-Maximilians-Universität München, Munich, Germany

<sup>2</sup>Center for International Climate Research (CICERO), Oslo, Norway

<sup>3</sup>Center for Earth System Research and Sustainability (CEN), University of Hamburg, Hamburg, Germany

## Supplementary Tables

**Table S1:** Overview of the 36 cities, their coordinates, elevation of the city centre, and whether a city is located close to the sea.

| City             | Latitude / ° | Longitude / ° | Elevation / m | Located close to sea? |
|------------------|--------------|---------------|---------------|-----------------------|
| Amsterdam        | 52.367       | 4.900         | -2            | yes                   |
| Athens           | 37.984       | 23.728        | 153           | yes                   |
| Barcelona        | 41.383       | 2.183         | 12            | yes                   |
| Belgrade         | 44.817       | 20.467        | 116           | no                    |
| Berlin           | 52.517       | 13.383        | 34            | no                    |
| Brussels         | 50.847       | 4.353         | 76            | no                    |
| Bucharest        | 44.433       | 26.104        | 70            | no                    |
| Budapest         | 47.493       | 19.051        | 102           | no                    |
| Copenhagen       | 55.676       | 12.568        | 5             | yes                   |
| Dublin           | 53.350       | -6.267        | 8             | yes                   |
| Hamburg          | 53.565       | 10.001        | 6             | no                    |
| Helsinki         | 60.171       | 24.938        | 25            | yes                   |
| Istanbul         | 41.014       | 28.955        | 40            | yes                   |
| Kazan            | 55.790       | 49.135        | 116           | no                    |
| Kharkiv          | 50.004       | 36.231        | 152           | no                    |
| Kyiv             | 50.450       | 30.523        | 168           | no                    |
| Lisbon           | 38.725       | -9.150        | 15            | yes                   |
| London           | 51.507       | -0.128        | 14            | no                    |
| Madrid           | 40.383       | -3.717        | 667           | no                    |
| Milan            | 45.467       | 9.183         | 152           | no                    |
| Minsk            | 53.900       | 27.567        | 198           | no                    |
| Moscow           | 55.750       | 37.617        | 124           | no                    |
| Munich           | 48.133       | 11.567        | 520           | no                    |
| Nizhny Novgorod  | 56.327       | 44.008        | 78            | no                    |
| Oslo             | 59.914       | 10.752        | 12            | yes                   |
| Paris            | 48.857       | 2.351         | 34            | no                    |
| Prague           | 50.083       | 14.417        | 244           | no                    |
| Riga             | 56.949       | 24.106        | 8             | yes                   |
| Rome             | 41.900       | 12.500        | 14            | no                    |
| Saint Petersburg | 59.950       | 30.300        | 13            | yes                   |
| Sofia            | 42.700       | 23.330        | 580           | no                    |
| Stockholm        | 59.329       | 18.069        | 15            | yes                   |
| Vienna           | 48.200       | 16.367        | 170           | no                    |
| Vilnius          | 54.683       | 25.283        | 124           | no                    |
| Warsaw           | 52.233       | 21.017        | 93            | no                    |
| Zagreb           | 45.817       | 15.983        | 130           | no                    |

**Table S2:** Overview of the EURO-CORDEX models used in this study. All simulations are performed using the EUR-11 resolution.

| GCM                   | RCM                          | Ensemble member |
|-----------------------|------------------------------|-----------------|
| CCCma-CanESM2         | CLMcom-CCLM4-8-17            | rlilpl          |
| CCCma-CanESM2         | GERICS-REMO2015              | rlilpl          |
| CNRM-CERFACS-CNRM-CM5 | CLMcom-CCLM4-8-17            | rlilpl          |
| CNRM-CERFACS-CNRM-CM5 | CNRM-ALADIN53                | rlilpl          |
| CNRM-CERFACS-CNRM-CM5 | CNRM-ALADIN63                | rlilpl          |
| CNRM-CERFACS-CNRM-CM5 | DMI-HIRHAM5                  | rlilpl          |
| CNRM-CERFACS-CNRM-CM5 | GERICS-REMO2015              | rlilpl          |
| CNRM-CERFACS-CNRM-CM5 | IPSL-WRF381P                 | rlilpl          |
| CNRM-CERFACS-CNRM-CM5 | KNMI-RACMO22E                | rlilpl          |
| CNRM-CERFACS-CNRM-CM5 | SMHI-RCA4                    | rlilpl          |
| CNRM-CERFACS-CNRM-CM5 | CLMcom-ETH-COSMO-crCLIM-v1-1 | rlilpl          |
| CNRM-CERFACS-CNRM-CM5 | ICTP-RegCM4-6                | rlilpl          |
| CNRM-CERFACS-CNRM-CM5 | MOHC-HadREM3-GA7-05          | rlilpl          |
| ICHEC-EC-EARTH        | CLMcom-CCLM4-8-17            | r12ilpl         |
| ICHEC-EC-EARTH        | CLMcom-ETH-COSMO-crCLIM-v1-1 | r12ilpl         |
| ICHEC-EC-EARTH        | CLMcom-ETH-COSMO-crCLIM-v1-1 | rlilpl          |
| ICHEC-EC-EARTH        | CLMcom-ETH-COSMO-crCLIM-v1-1 | r3ilpl          |
| ICHEC-EC-EARTH        | DMI-HIRHAM5                  | r12ilpl         |
| ICHEC-EC-EARTH        | DMI-HIRHAM5                  | rlilpl          |
| ICHEC-EC-EARTH        | DMI-HIRHAM5                  | r3ilpl          |
| ICHEC-EC-EARTH        | GERICS-REMO2015              | r12ilpl         |
| ICHEC-EC-EARTH        | ICTP-RegCM4-6                | r12ilpl         |
| ICHEC-EC-EARTH        | IPSL-WRF381P                 | r12ilpl         |
| ICHEC-EC-EARTH        | KNMI-RACMO22E                | r12ilpl         |
| ICHEC-EC-EARTH        | KNMI-RACMO22E                | rlilpl          |
| ICHEC-EC-EARTH        | KNMI-RACMO22E                | r3ilpl          |
| ICHEC-EC-EARTH        | MOHC-HadREM3-GA7-05          | r12ilpl         |
| ICHEC-EC-EARTH        | SMHI-RCA4                    | r12ilpl         |
| ICHEC-EC-EARTH        | SMHI-RCA4                    | rlilpl          |
| ICHEC-EC-EARTH        | SMHI-RCA4                    | r3ilpl          |
| IPSL-IPSL-CM5A-MR     | DMI-HIRHAM5                  | rlilpl          |
| IPSL-IPSL-CM5A-MR     | GERICS-REMO2015              | rlilpl          |
| IPSL-IPSL-CM5A-MR     | IPSL-WRF381P                 | rlilpl          |
| IPSL-IPSL-CM5A-MR     | KNMI-RACMO22E                | rlilpl          |
| IPSL-IPSL-CM5A-MR     | SMHI-RCA4                    | rlilpl          |
| MIROC-MIROC5          | CLMcom-CCLM4-8-17            | rlilpl          |
| MIROC-MIROC5          | GERICS-REMO2015              | rlilpl          |
| MOHC-HadGEM2-ES       | CLMcom-CCLM4-8-17            | rlilpl          |
| MOHC-HadGEM2-ES       | CLMcom-ETH-COSMO-crCLIM-v1-1 | rlilpl          |
| MOHC-HadGEM2-ES       | CNRM-ALADIN63                | rlilpl          |
| MOHC-HadGEM2-ES       | DMI-HIRHAM5                  | rlilpl          |
| MOHC-HadGEM2-ES       | GERICS-REMO2015              | rlilpl          |
| MOHC-HadGEM2-ES       | ICTP-RegCM4-6                | rlilpl          |
| MOHC-HadGEM2-ES       | IPSL-WRF381P                 | rlilpl          |

| <b>GCM</b>       | <b>RCM</b>                   | <b>Ensemble member</b> |
|------------------|------------------------------|------------------------|
| MOHC-HadGEM2-ES  | KNMI-RACMO22E                | r1i1p1                 |
| MOHC-HadGEM2-ES  | MOHC-HadREM3-GA7-05          | r1i1p1                 |
| MOHC-HadGEM2-ES  | SMHI-RCA4                    | r1i1p1                 |
| MPI-M-MPI-ESM-LR | CLMcom-CCLM4-8-17            | r1i1p1                 |
| MPI-M-MPI-ESM-LR | CLMcom-ETH-COSMO-crCLIM-v1-1 | r1i1p1                 |
| MPI-M-MPI-ESM-LR | CLMcom-ETH-COSMO-crCLIM-v1-1 | r2i1p1                 |
| MPI-M-MPI-ESM-LR | CLMcom-ETH-COSMO-crCLIM-v1-1 | r3i1p1                 |
| MPI-M-MPI-ESM-LR | CNRM-ALADIN63                | r1i1p1                 |
| MPI-M-MPI-ESM-LR | DMI-HIRHAM5                  | r1i1p1                 |
| MPI-M-MPI-ESM-LR | GERICS-REMO2015              | r3i1p1                 |
| MPI-M-MPI-ESM-LR | ICTP-RegCM4-6                | r1i1p1                 |
| MPI-M-MPI-ESM-LR | KNMI-RACMO22E                | r1i1p1                 |
| MPI-M-MPI-ESM-LR | MOHC-HadREM3-GA7-05          | r1i1p1                 |
| MPI-M-MPI-ESM-LR | MPI-CSC-REMO2009             | r1i1p1                 |
| MPI-M-MPI-ESM-LR | MPI-CSC-REMO2009             | r2i1p1                 |
| MPI-M-MPI-ESM-LR | SMHI-RCA4                    | r1i1p1                 |
| MPI-M-MPI-ESM-LR | SMHI-RCA4                    | r2i1p1                 |
| MPI-M-MPI-ESM-LR | SMHI-RCA4                    | r3i1p1                 |
| MPI-M-MPI-ESM-LR | IPSL-WRF381P                 | r1i1p1                 |
| NCC-NorESM1-M    | CLMcom-ETH-COSMO-crCLIM-v1-1 | r1i1p1                 |
| NCC-NorESM1-M    | CNRM-ALADIN63                | r1i1p1                 |
| NCC-NorESM1-M    | DMI-HIRHAM5                  | r1i1p1                 |
| NCC-NorESM1-M    | GERICS-REMO2015              | r1i1p1                 |
| NCC-NorESM1-M    | IPSL-WRF381P                 | r1i1p1                 |
| NCC-NorESM1-M    | KNMI-RACMO22E                | r1i1p1                 |
| NCC-NorESM1-M    | MOHC-HadREM3-GA7-05          | r1i1p1                 |
| NCC-NorESM1-M    | SMHI-RCA4                    | r1i1p1                 |
| NCC-NorESM1-M    | ICTP-RegCM4-6                | r1i1p1                 |

**Table S3:** Overview of the CMIP5 models used in this study. Models are only considered if they reach 3 °C European warming (20-year ESAT average relative to 1981-2010) before 2100 in RCP8.5. Models used for constructing the EURO-CORDEX GCM ensemble are marked with an asterisk (\*). Ensemble members indicated in parentheses are only used for the EURO-CORDEX GCM ensemble. The member r3i1p1 for EC-EARTH, which is used to drive several EURO-CORDEX RCMs, is not available from the ESGF servers.

| <b>Model</b>  | <b>Ensemble member</b>  |
|---------------|-------------------------|
| ACCESS1-0     | r1p1f1                  |
| ACCESS1-3     | r1p1f1                  |
| bcc-csm1-1    | r1p1f1                  |
| bcc-csm1-1-m  | r1p1f1                  |
| BNU-ESM       | r1p1f1                  |
| CanESM2*      | r1p1f1                  |
| CESM1-CAM5    | r1p1f1                  |
| CNRM-CM5*     | r1p1f1                  |
| CSIRO-Mk3-6-0 | r1p1f1                  |
| EC-EARTH*     | r1i1p1 (r12i1p1)        |
| GFDL-CM3      | r1p1f1                  |
| GFDL-ESM2G    | r1p1f1                  |
| GFDL-ESM2M    | r1p1f1                  |
| HadGEM2-AO    | r1p1f1                  |
| HadGEM2-CC    | r1p1f1                  |
| HadGEM2-ES*   | r1p1f1                  |
| IPSL-CM5A-LR  | r1p1f1                  |
| IPSL-CM5A-MR* | r1p1f1                  |
| IPSL-CM5B-LR  | r1p1f1                  |
| MIROC5*       | r1p1f1                  |
| MPI-ESM-LR*   | r1p1f1 (r2p1f1, r3p1f1) |
| MRI-CGCM3     | r1p1f1                  |
| MRI-ESM1      | r1p1f1                  |
| NorESM1-M*    | r1p1f1                  |

**Table S4:** Overview of the CMIP6 models used in this study.

| <b>Model</b>    | <b>Ensemble member</b> |
|-----------------|------------------------|
| ACCESS-CM2      | rlilplf1               |
| ACCESS-ESM1-5   | rlilplf1               |
| CNRM-CM6-1      | rlilplf2               |
| CNRM-CM6-1-HR   | rlilplf2               |
| CNRM-ESM2-1     | rlilplf2               |
| CanESM5         | rlilplf1               |
| EC-Earth3       | rlilplf1               |
| EC-Earth3-Veg   | rlilplf1               |
| FGOALS-g3       | rlilplf1               |
| GFDL-CM4        | rlilplf1               |
| GFDL-ESM4       | rlilplf1               |
| HadGEM3-GC31-LL | rlilplf3               |
| HadGEM3-GC31-MM | rlilplf3               |
| INM-CM4-8       | rlilplf1               |
| INM-CM5-0       | rlilplf1               |
| KACE-1-0-G      | rlilplf1               |
| KIOST-ESM       | rlilplf1               |
| MIROC-ES2L      | rlilplf2               |
| MPI-ESM1-2-HR   | rlilplf1               |
| MPI-ESM1-2-LR   | rlilplf1               |
| MRI-ESM2-0      | rlilplf1               |
| NorESM2-LM      | rlilplf1               |
| NorESM2-MM      | rlilplf1               |
| UKESM1-0-LL     | rlilplf2               |

## Supplementary Figures

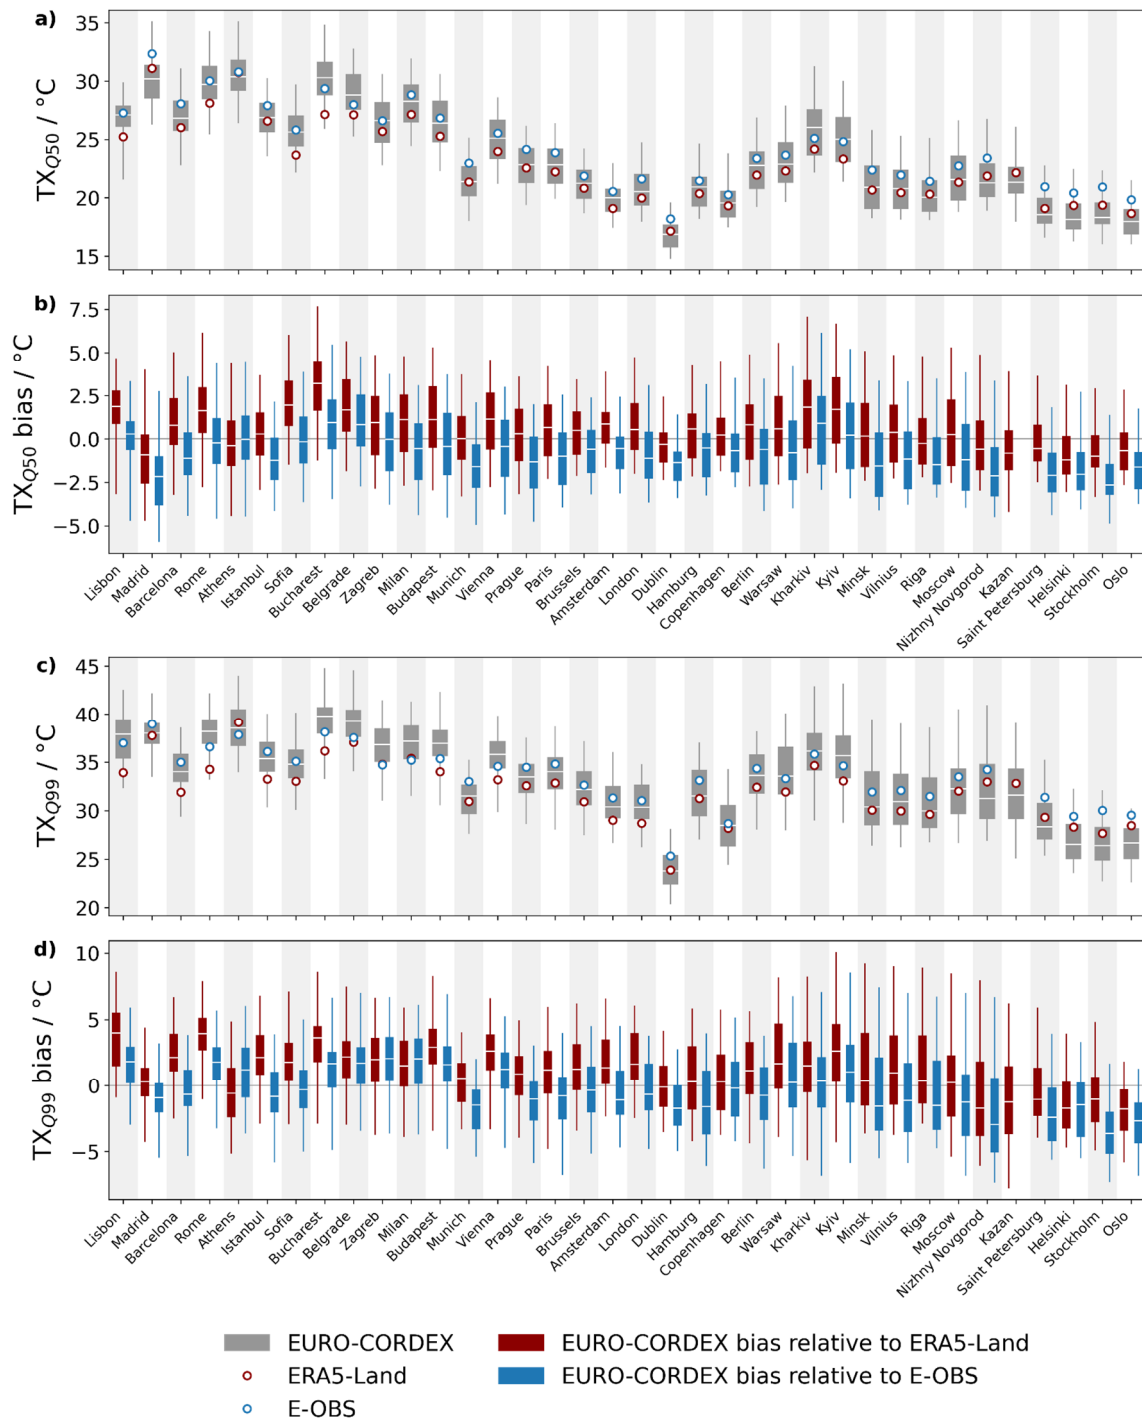

**Figure S1:** Comparison of EURO-CORDEX with ERA5-Land and E-OBS for daily maximum temperature (TX) in summer (June, July, August) during 1981-2010. Panels a) and b) show the comparison for the TX median; panels c) and d) for the 99<sup>th</sup> quantile of TX. Panels a) and c) show the distribution of EURO-CORDEX models (grey box plots) versus ERA5-Land (red circles) and E-OBS (blue circles). Panels b) and d) show the EURO-CORDEX bias against ERA5-Land (red box plots) and E-OBS (blue box plots). Lines in the box plots indicate the median, boxes the interquartile range, and whiskers the minimum-to-maximum range.

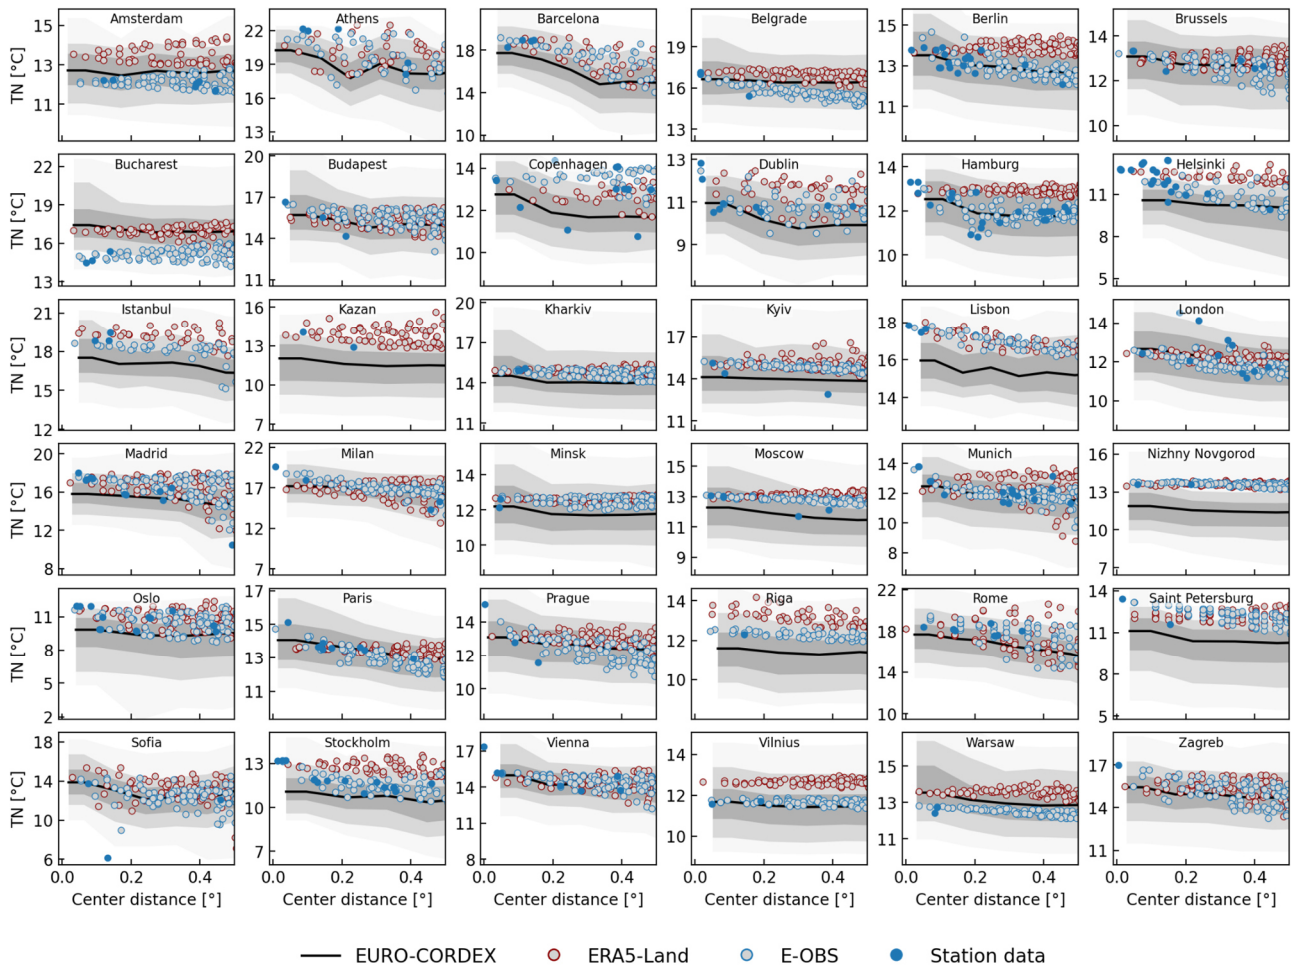

**Figure S2:** As in Figure 3 but for daily minimum temperature (TN).



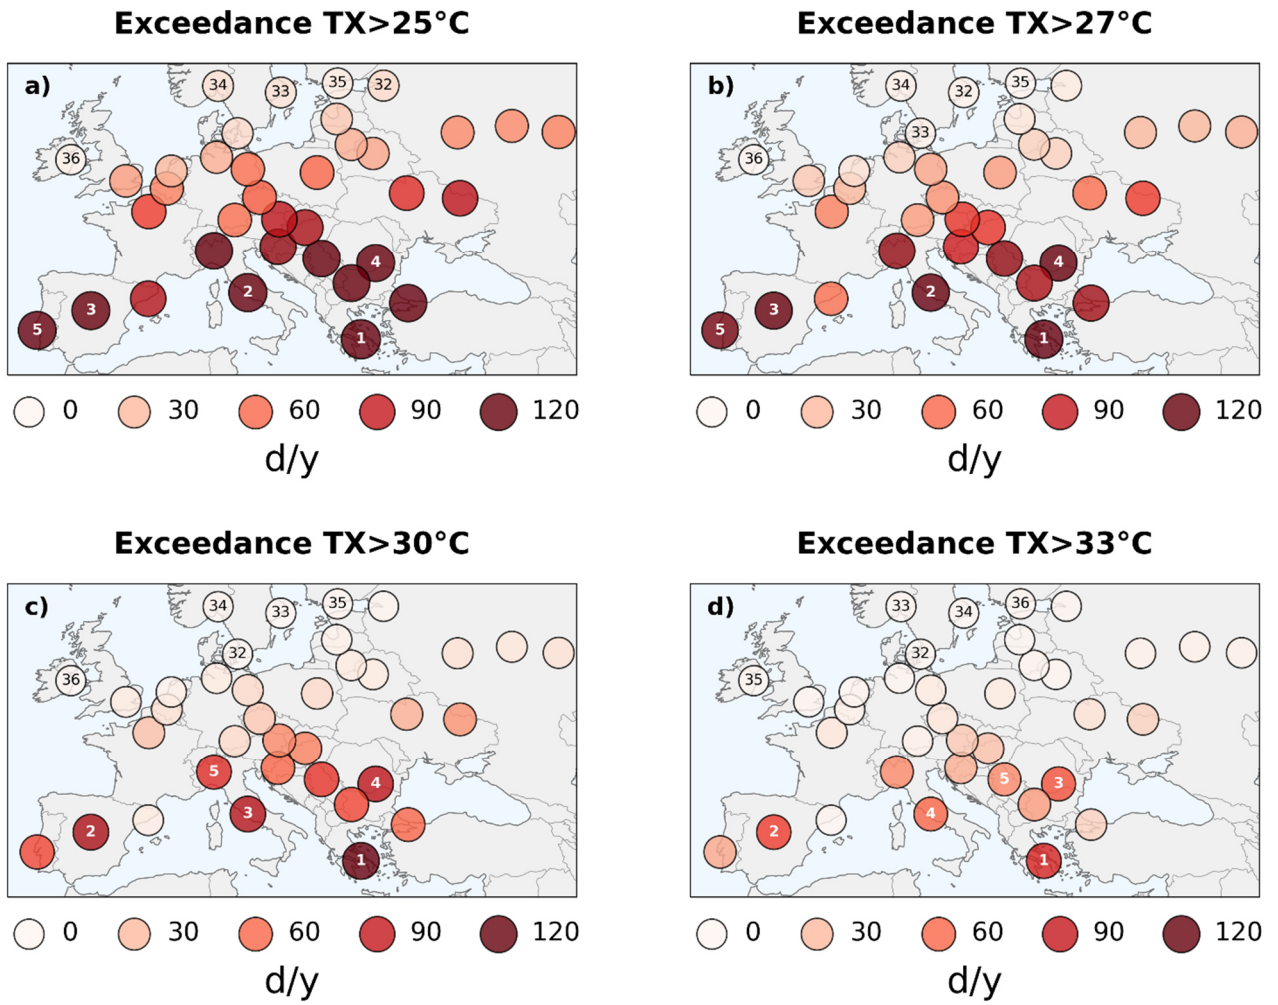

**Figure S3:** As in Figure 4 b) but for exceedances of a) 25 °C, b) 27 °C, c) 30 °C, and d) 33 °C.

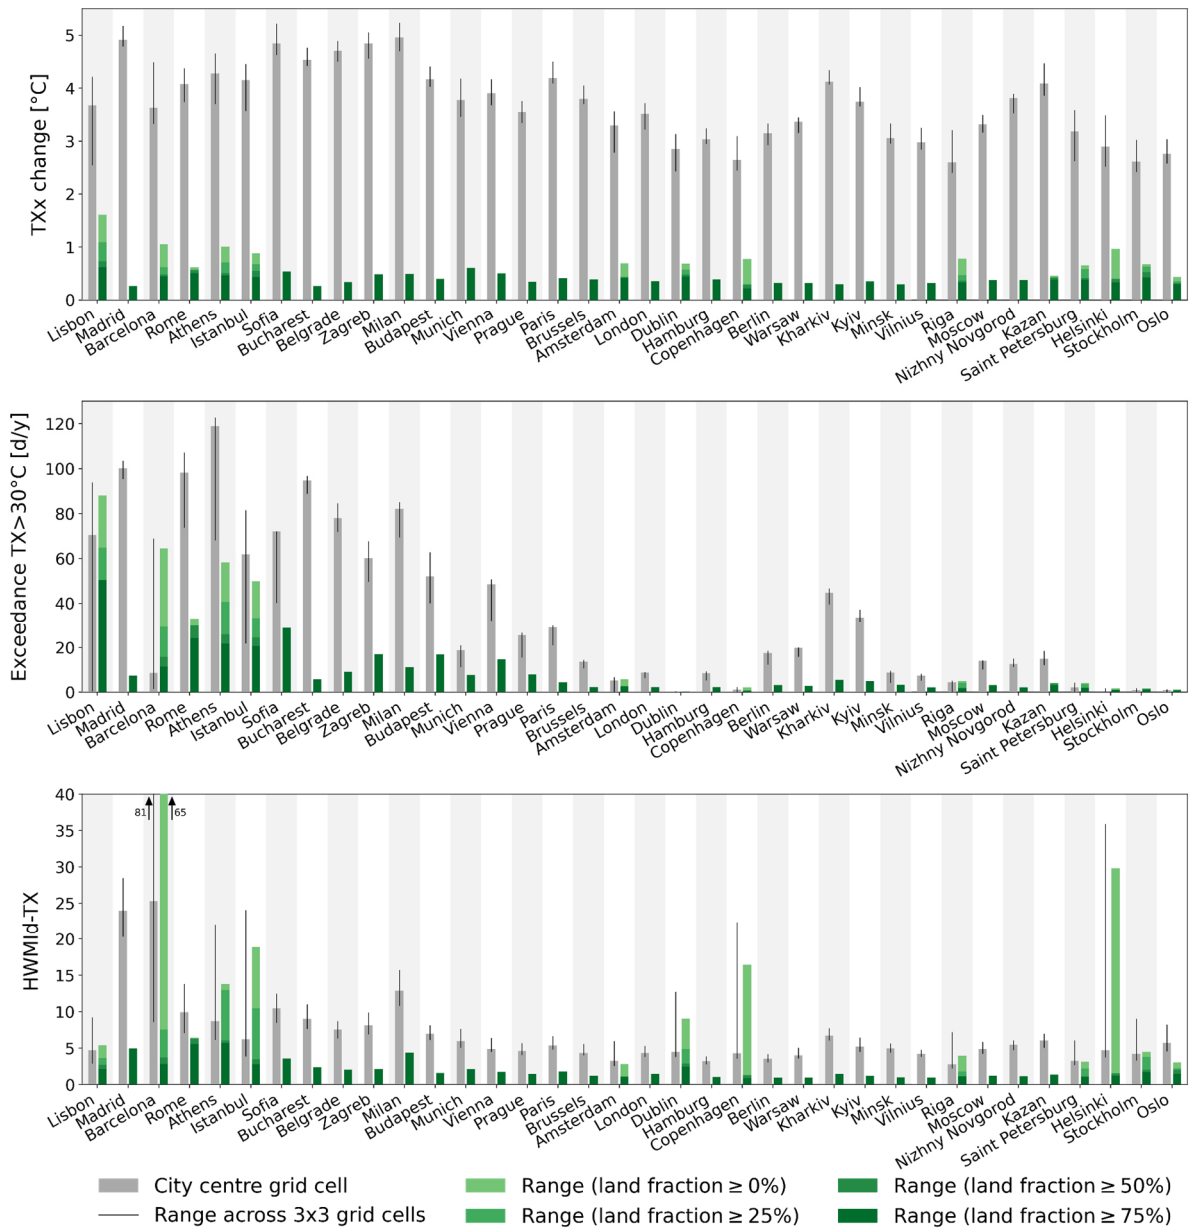

**Figure S4:** Comparison of heat stress projections by the EURO-CORDEX ensemble considering the grid cell closest to the centre of each city (grey bars; multi-model median) and based on a box of 3x3 grid cells around the city centres (black whiskers and green bars) for a) change in yearly maximum temperature (TXx) between 1981-2010 and 3 °C European warming, b) TX exceedances above 30 °C at 3 °C European warming, and c) Heat Wave Magnitude Index daily based on TX (HWMId-TX) at 3 °C European warming. Black whiskers denote the minimum-to-maximum range across the 3x3 grid cells (multi-model median). Green bars also show the minimum-to-maximum range across grid cells, with the shading intensity indicating that only grid cells with varying degrees of minimum land fraction are considered (light green: all grid cells are considered; increasing shading intensity: only grid cells with at least 25%, 50%, and 75% land fraction are considered).

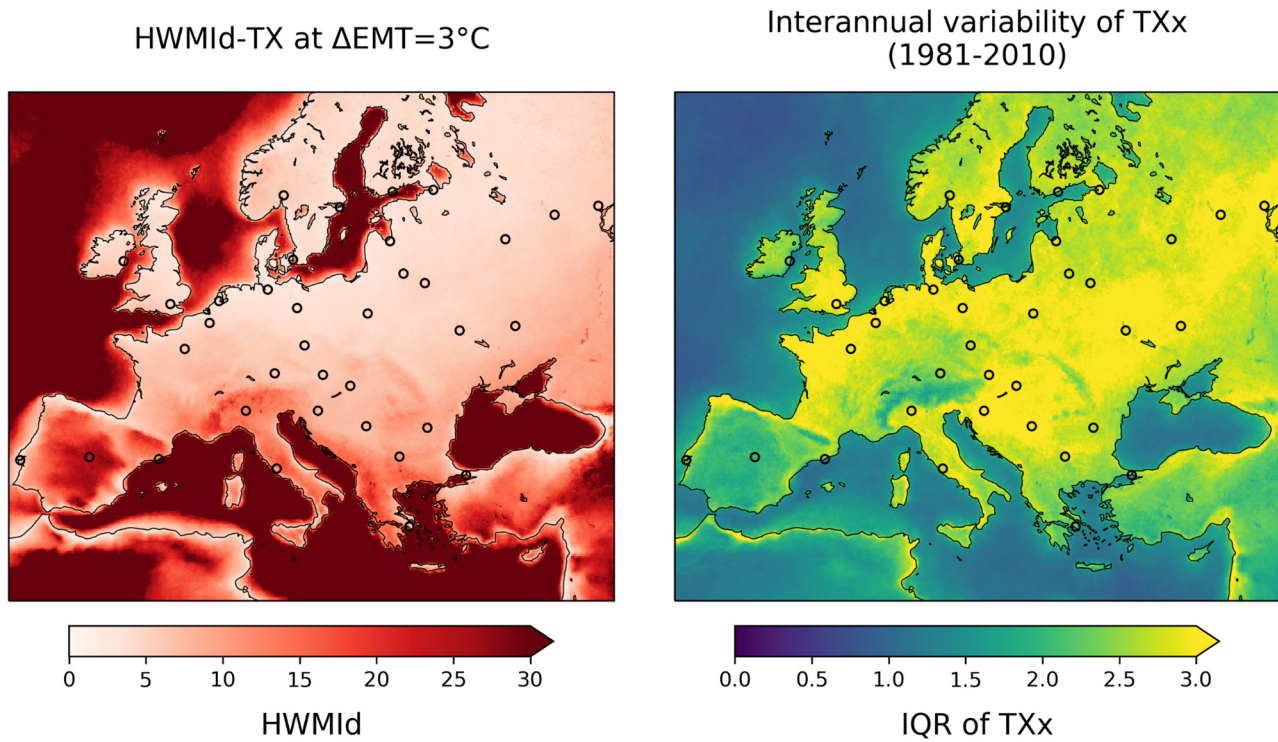

**Figure S5:** Heat Wave Magnitude Index daily based on daily maximum temperature (HWMId-TX) at  $3^{\circ}C$  European warming and interannual variability (interquartile range) of yearly maximum temperature (TXx) in the reference period 1981-2010. The multi-model median of the EURO-CORDEX ensemble is shown for both estimates. Small black circles indicate the location of the 36 cities analysed in this study.

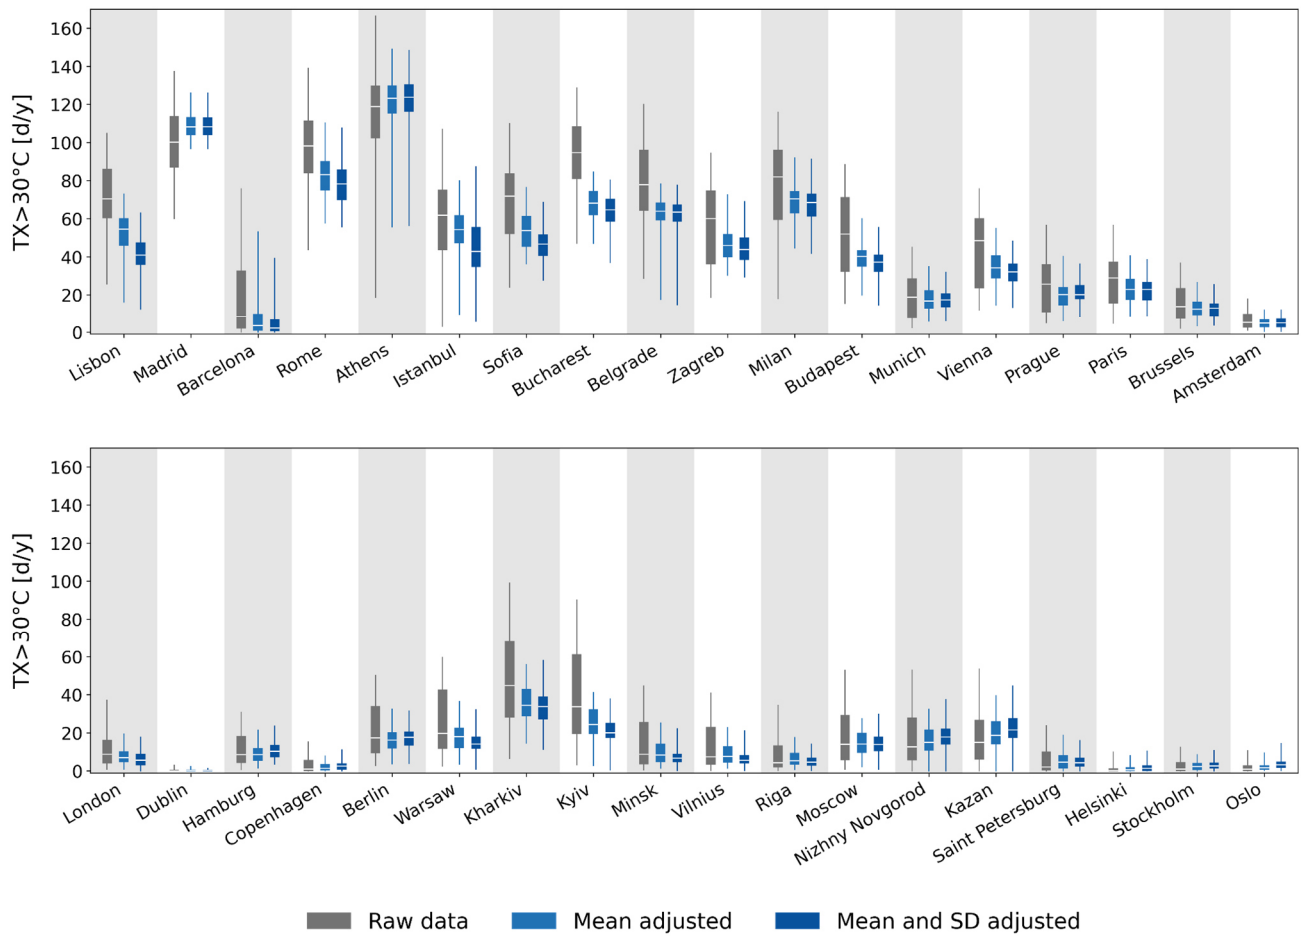

**Figure S6:** Sensitivity analysis for TX exceedances above 30 °C at 3 °C European warming. Grey box plots show estimates based on the original EURO-CORDEX data, light blue box plots show estimates for EURO-CORDEX data with the mean adjusted to ERA5-Land, and dark blue box plots show estimates for EURO-CORDEX data with the mean and standard deviation adjusted to ERA5-Land. The reference period for the adjustment is 1981-2010. Boxes (whiskers) indicate the interquartile range (minimum-to-maximum range) across EURO-CORDEX models.

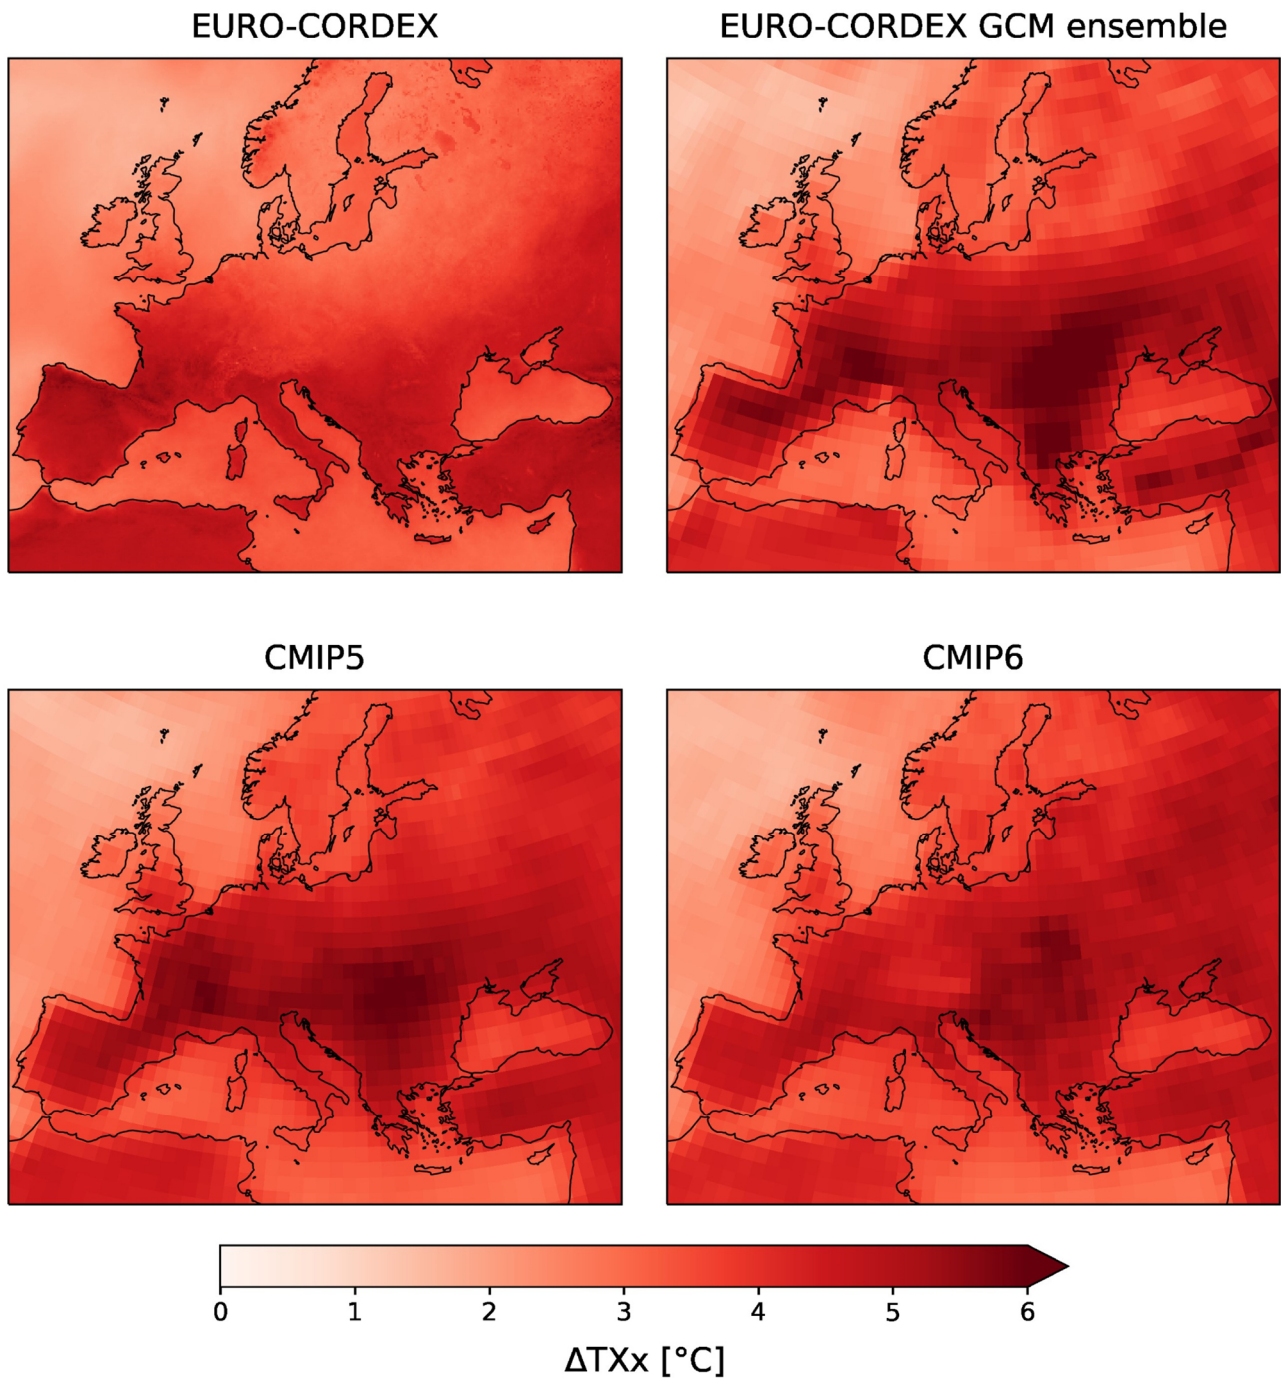

**Figure S7:** Multi-model median change in yearly maximum temperature ( $\Delta TX_x$ ) at 3 °C European warming relative to 1981-2010 for the EURO-CORDEX ensemble, the EURO-CORDEX GCM ensemble, the CMIP5 ensemble, and the CMIP6 ensemble according to the RCP8.5 scenario (EURO-CORDEX, EURO-CORDEX GCM ensemble, CMIP5) and the SSP5-8.5 scenario (CMIP6). Data for CMIP5 and CMIP6 were interpolated bilinearly to 1° resolution before calculating the multi-model median.
